# Supplementary material for: Antibacterial Activity of Two Zn-MOFs Containing a Tricarboxylate Linker
Source: MDPI journal article supplement (doi:10.3390/nano12234139), 2022-11-23
Supplement: s1 [file s1]

# Antibacterial Activity of Two Zn-MOFs Containing a Tricarboxylate Linker

Sara Rojas <sup>1</sup>, Amalia García-García <sup>1</sup>, Tania Hidalgo <sup>2</sup>, María Rosales <sup>1</sup>, Daniel Ruiz-Camino <sup>2</sup>, Pablo Salcedo-Abraira <sup>2</sup>, Helena Montes-Andrés <sup>1</sup>, Duane Choquesillo-Lazarte <sup>3</sup>, Roberto Rosal <sup>4</sup>, Patricia Horcajada <sup>2,\*</sup> and Antonio Rodríguez-Diéguez <sup>1,\*</sup>

<sup>1</sup> Department of Inorganic Chemistry, Faculty of Science, University of Granada, Av. Fuentenueva s/n, 18071 Granada, Spain

<sup>2</sup> Advanced Porous Materials Unit, IMDEA Energy Institute, Av. Ramón de la Sagra 3, 28935 Móstoles, Spain

<sup>3</sup> Laboratorio de Estudios Cristalográficos, IACT-CSIC, Av. de las Palmeras, 4, 18100 Armilla, Spain

<sup>4</sup> Department of Chemical Engineering, University of Alcalá, 28871 Alcalá de Henares, Spain

\* Correspondence: patricia.horcajada@imdea.org (P.H.); antonio5@ugr.es (A.R.-D.)

## Table of content

|                                            |        |
|--------------------------------------------|--------|
| S1. Coordination modes.....                | S2     |
| S2. Crystallographic information.....      | S3-S5  |
| S3. Physicochemical characterization ..... | S6-S8  |
| S4. Antibacterial activity.....            | S9-S10 |

### S1. Coordination modes

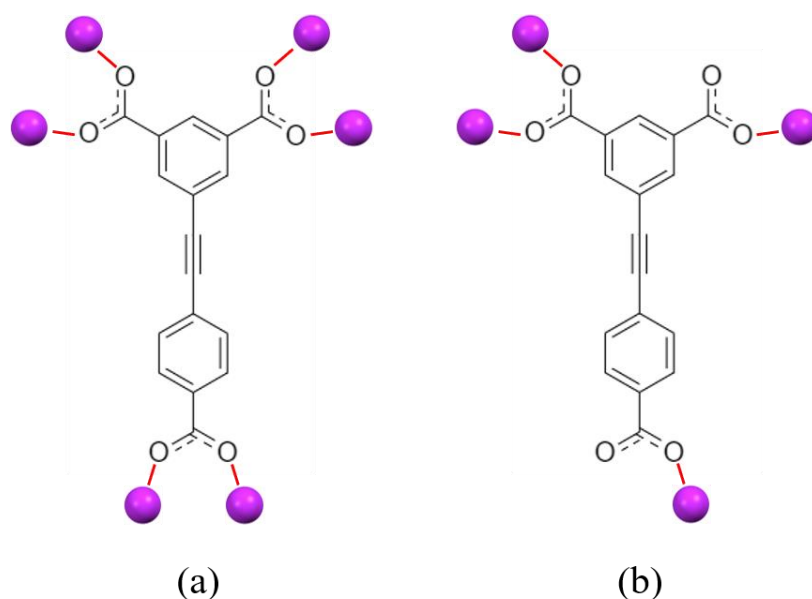

**Figure S1.** Coordination modes of the linker H<sub>3</sub>L in the new MOFs. GR-MOF-8 contains modes (a) and (b), whereas GR-MOF-9 is made of linkers with coordination mode (a). Metal ions are indicated in purple color.

## S2. Crystallographic information

**Table S1.** Table of the selected bond lengths (Å) and angles (°) for GR-MOF-8.

| Bond    | Distance (Å) | Angle       | Degree (°) |
|---------|--------------|-------------|------------|
| Zn1-O1  | 1.985(10)    | O1-Zn1-O22  | 104.6(5)   |
| Zn1-O22 | 1.995(11)    | O1-Zn1-O24  | 111.7(4)   |
| Zn1-O24 | 1.931(9)     | O1-Zn1-O25  | 102.7(6)   |
| Zn1-O25 | 1.947(14)    | O22-Zn1-O24 | 110.7(4)   |
| Zn2-O8  | 1.967(9)     | O22-Zn1-O25 | 114.2(5)   |
| Zn2-O23 | 2.000(9)     | O24-Zn1-O25 | 112.4(5)   |
| Zn2-O24 | 1.969(8)     | O8-Zn2-O23  | 101.7(4)   |
| Zn2-O28 | 1.951(9)     | O8-Zn2-O24  | 108.3(3)   |
| Zn3-O2  | 1.974(11)    | O8-Zn2-O28  | 109.6(4)   |
| Zn3-O9  | 1.910(10)    | O23-Zn2-O24 | 110.9(4)   |
| Zn3-O24 | 1.943(7)     | O23-Zn2-O28 | 103.9(4)   |
| Zn3-O36 | 1.931(10)    | O24-Zn2-O28 | 120.8(4)   |
| Zn4-O24 | 1.929(9)     | O2-Zn3-O9   | 107.0(5)   |
| Zn4-O27 | 2.011(11)    | O2-Zn3-O24  | 108.9(4)   |
| Zn4-O35 | 2.008(9)     | O2-Zn3-O36  | 107.4(5)   |
| Zn4-O49 | 1.971(8)     | O9-Zn3-O24  | 111.6(4)   |
|         |              | O9-Zn3-O36  | 112.5(4)   |
|         |              | O24-Zn3-O36 | 109.2(4)   |
|         |              | O24-Zn4-O27 | 108.6(5)   |
|         |              | O24-Zn4-O35 | 112.3(4)   |
|         |              | O24-Zn4-O49 | 121.9(4)   |
|         |              | O27-Zn4-O35 | 100.9(5)   |
|         |              | O27-Zn4-O49 | 110.2(4)   |
|         |              | O35-Zn4-O49 | 100.8(4)   |
|         |              | Zn1-O24-Zn2 | 108.1(4)   |
|         |              | Zn1-O24-Zn3 | 110.1(4)   |
|         |              | Zn1-O24-Zn4 | 107.7(4)   |
|         |              | Zn2-O24-Zn3 | 108.7(4)   |
|         |              | Zn2-O24-Zn4 | 112.0(4)   |
|         |              | Zn3-O24-Zn4 | 110.2(4)   |

**Table S2.** Table of the selected bond lengths (Å) and angles (°) for GR-MOF-9.

| Bond      | Distance (Å) | Angle          | Degree (°) |
|-----------|--------------|----------------|------------|
| Zn00-O005 | 1.97(2)      | O005-Zn00-O009 | 100.7(11)  |
| Zn00-O009 | 2.14(3)      | O005-Zn00-O00B | 100.6(11)  |
| Zn00-O00B | 2.13(3)      | O005-Zn00-O0AA | 105.8(11)  |
| Zn00-O1   | 1.92(7)      | O005-Zn00-O1A  | 108(2)     |
| Zn00-O0AA | 2.00(3)      | O009-Zn00-O1A  | 151(2)     |
| Zn00-O1A  | 2.14(6)      | O00B-Zn00-O009 | 86.2(11)   |
| Zn1-O005  | 1.95(3)      | O00B-Zn00-O1A  | 91.2(18)   |
| Zn1-O00E  | 2.04(3)      | O1-Zn00-O005   | 104.9(19)  |
| Zn1-O00T  | 1.96(6)      | O1-Zn00-O009   | 153(2)     |
| Zn1-O3    | 1.94(3)      | O1-Zn00-O00B   | 80(2)      |
| Zn1-O8CA  | 2.33(6)      | O1-Zn00-O0AA   | 97.0(17)   |
| Zn2-O005  | 1.96(3)      | O0AA-Zn00-O009 | 84.6(11)   |
| Zn2-O00D  | 2.05(3)      | O0AA-Zn00-O00B | 153.2(11)  |
| Zn2-O00J  | 1.93(3)      | O0AA-Zn00-O1A  | 84.9(19)   |
| Zn2-O01X  | 1.94(6)      | O005-Zn1-O00E  | 108.5(11)  |
| Zn2-O0CA  | 2.33(6)      | O005-Zn1-O00T  | 121(2)     |
| Zn04-O005 | 2.00(3)      | O005-Zn1-O8CA  | 83.6(15)   |
| Zn04-O00K | 2.05(6)      | O00E-Zn1-O8CA  | 153.7(17)  |
| Zn04-O2   | 2.07(6)      | O00T-Zn1-O00E  | 100.7(19)  |
| Zn04-O1AA | 2.05(6)      | O00T-Zn1-O8CA  | 54(2)      |
| Zn04-O2AA | 2.04(6)      | O3-Zn1-O005    | 113.0(11)  |
| Zn04-O3AA | 1.97(3)      | O3-Zn1-O00E    | 100.7(13)  |
|           |              | O3-Zn1-O00T    | 111(2)     |
|           |              | O3-Zn1-O8CA    | 95.4(18)   |
|           |              | O005-Zn2-O00D  | 108.0(11)  |
|           |              | O005-Zn2-O0CA  | 83.5(15)   |
|           |              | O00D-Zn2-O0CA  | 155.0(16)  |
|           |              | O00J-Zn2-O005  | 112.7(11)  |
|           |              | O00J-Zn2-O00D  | 100.8(13)  |
|           |              | O00J-Zn2-O01X  | 112(2)     |
|           |              | O00J-Zn2-O0CA  | 94.6(17)   |
|           |              | O01X-Zn2-O005  | 120(2)     |
|           |              | O01X-Zn2-O00D  | 101.1(18)  |
|           |              | O01X-Zn2-O0CA  | 55(2)      |
|           |              | O005-Zn04-O00K | 94.6(18)   |
|           |              | O005-Zn04-O2   | 94.4(19)   |
|           |              | O005-Zn04-O1AA | 94.5(18)   |
|           |              | O005-Zn04-O2AA | 95(2)      |
|           |              | O1AA-Zn04-O2   | 171(3)     |
|           |              | O2AA-Zn04-O00K | 170(3)     |
|           |              | O3AA-Zn04-O005 | 177.6(12)  |

|                |           |
|----------------|-----------|
| O3AA-Zn04-O00K | 84.4(19)  |
| O3AA-Zn04-O2   | 87.7(19)  |
| O3AA-Zn04-O1AA | 83.6(19)  |
| O3AA-Zn04-O2AA | 86(2)     |
| Zn00-O005-Zn1  | 109.2(12) |
| Zn00-O005-Zn2  | 108.7(12) |
| Zn00-O005-Zn04 | 107.9(11) |
| Zn1-O005-Zn2   | 110.8(11) |
| Zn1-O005-Zn04  | 110.3(12) |
| Zn2-O005-Zn04  | 109.9(12) |

### S3. Physicochemical characterization

The lattice parameters were refined using TOPAS software (version 5, Bruker AXS, Karlsruhe, Germany). There is a good agreement between the data and the model.

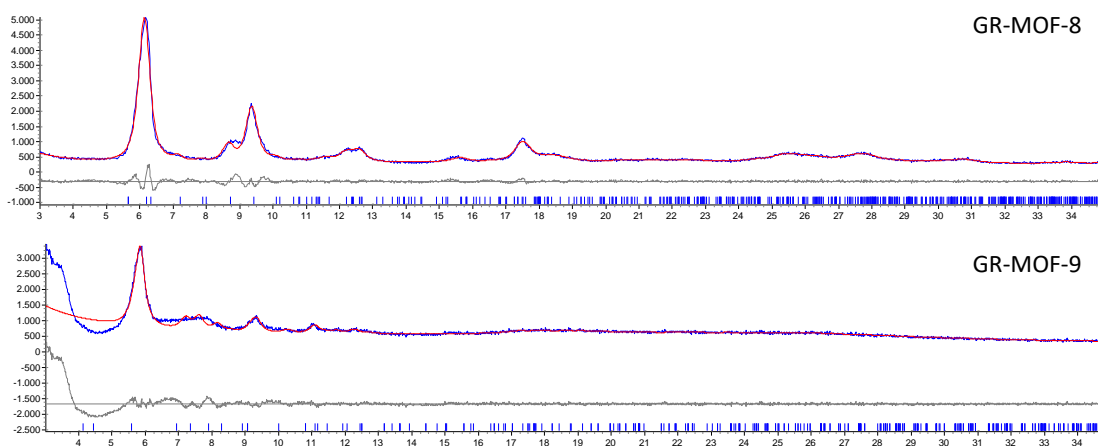

**Figure S2.** Le Bail fitting of GR-MOF-8 and 9.

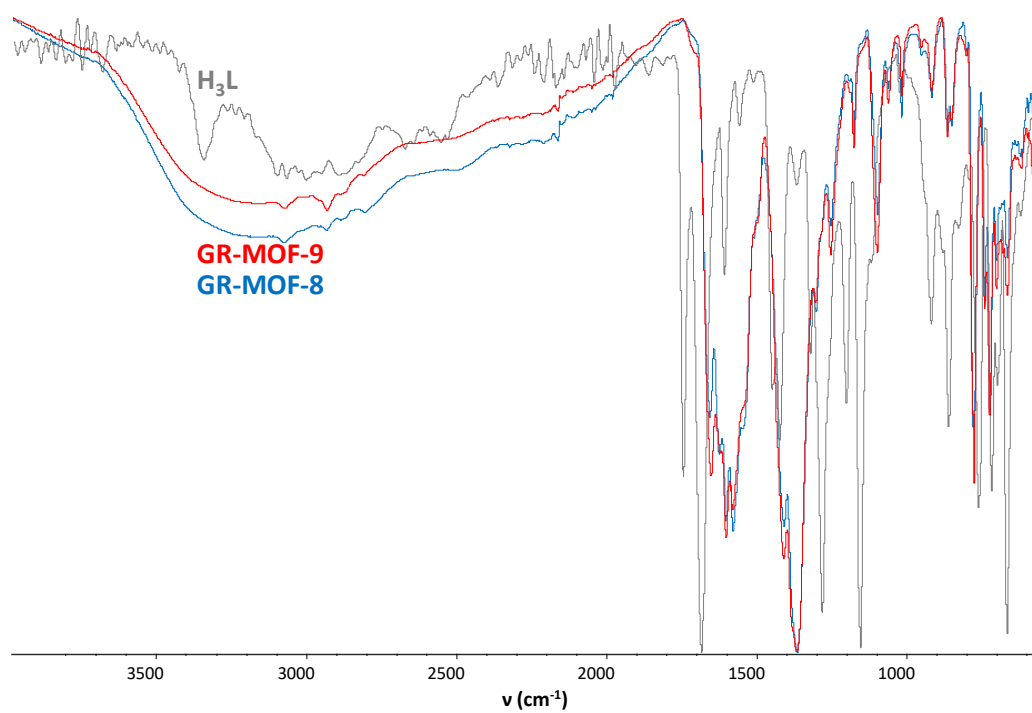

**Figure S3.** Fourier transform infrared spectroscopy (FTIR) spectra of the GR-MOF-8 (blue) and 9 (red), and the  $\text{H}_3\text{L}$  linker (grey).

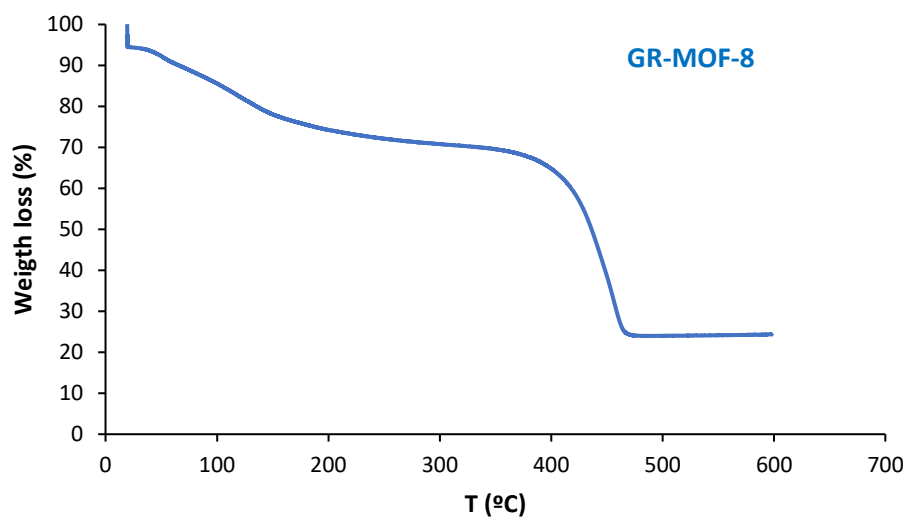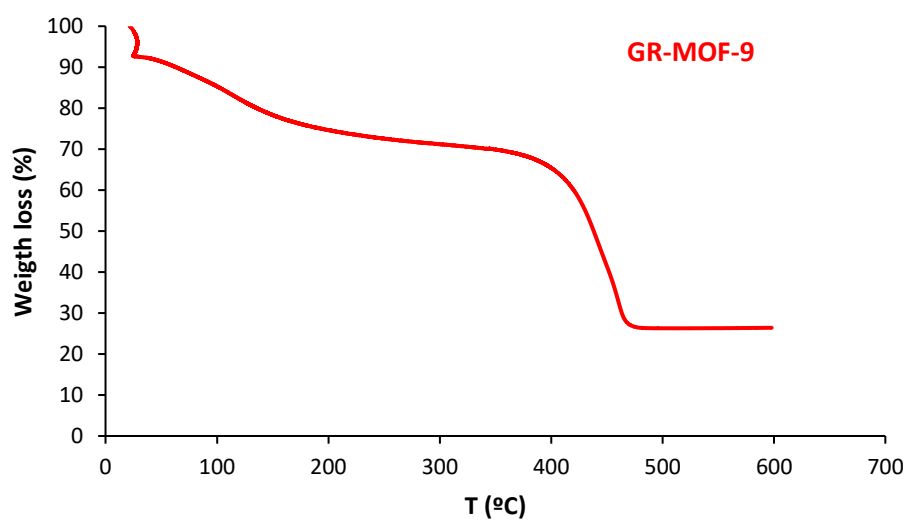

**Figure S4.** Thermogravimetric analysis (TGA) of the GR-MOF-8 and 9 materials.

## GR-MOF-8

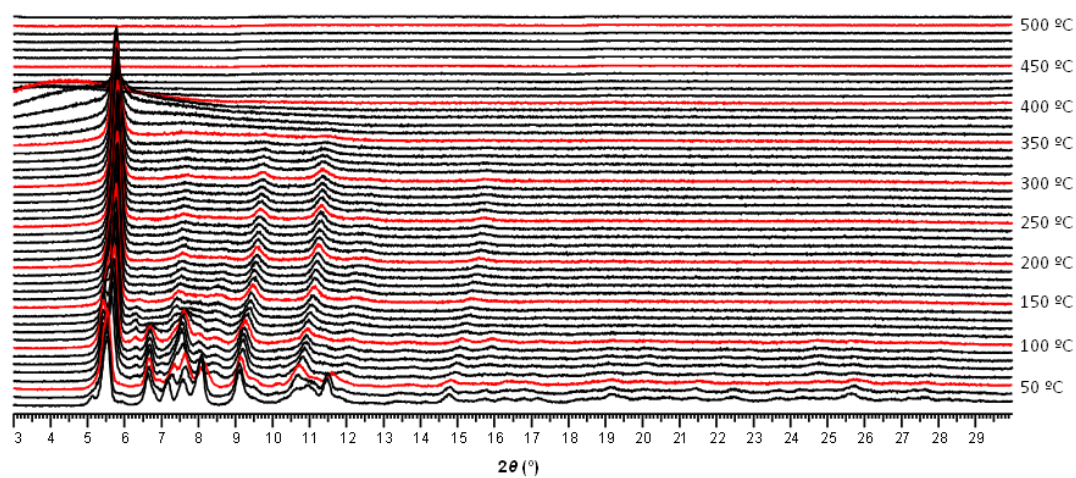

## GR-MOF-9

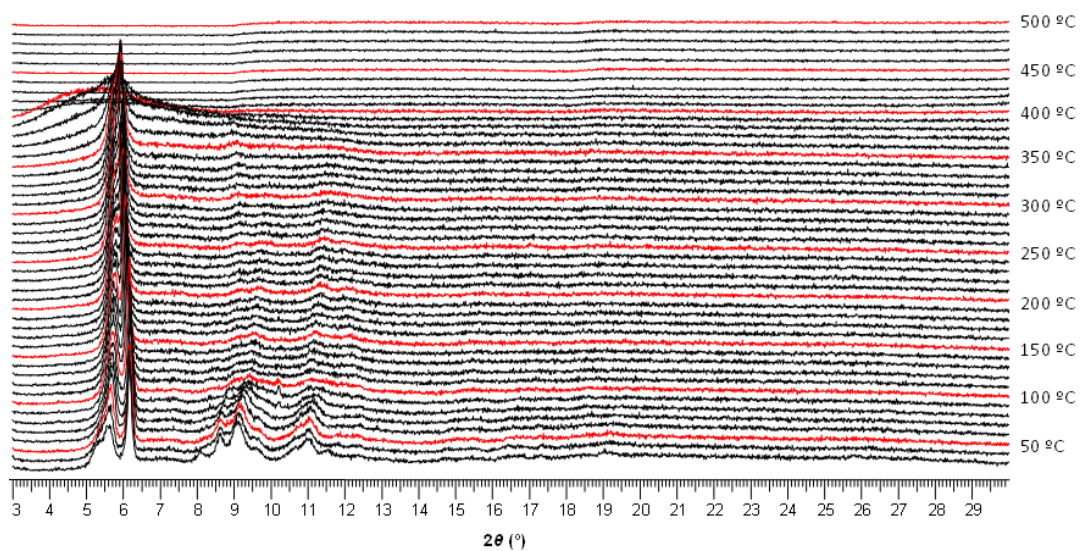

**Figure S5.** Variable-temperature powder X-ray diffraction (VTPXRD) of the GR-MOF-8 and 9 materials from 25 to 500 °C.

## S4. Antibacterial activity

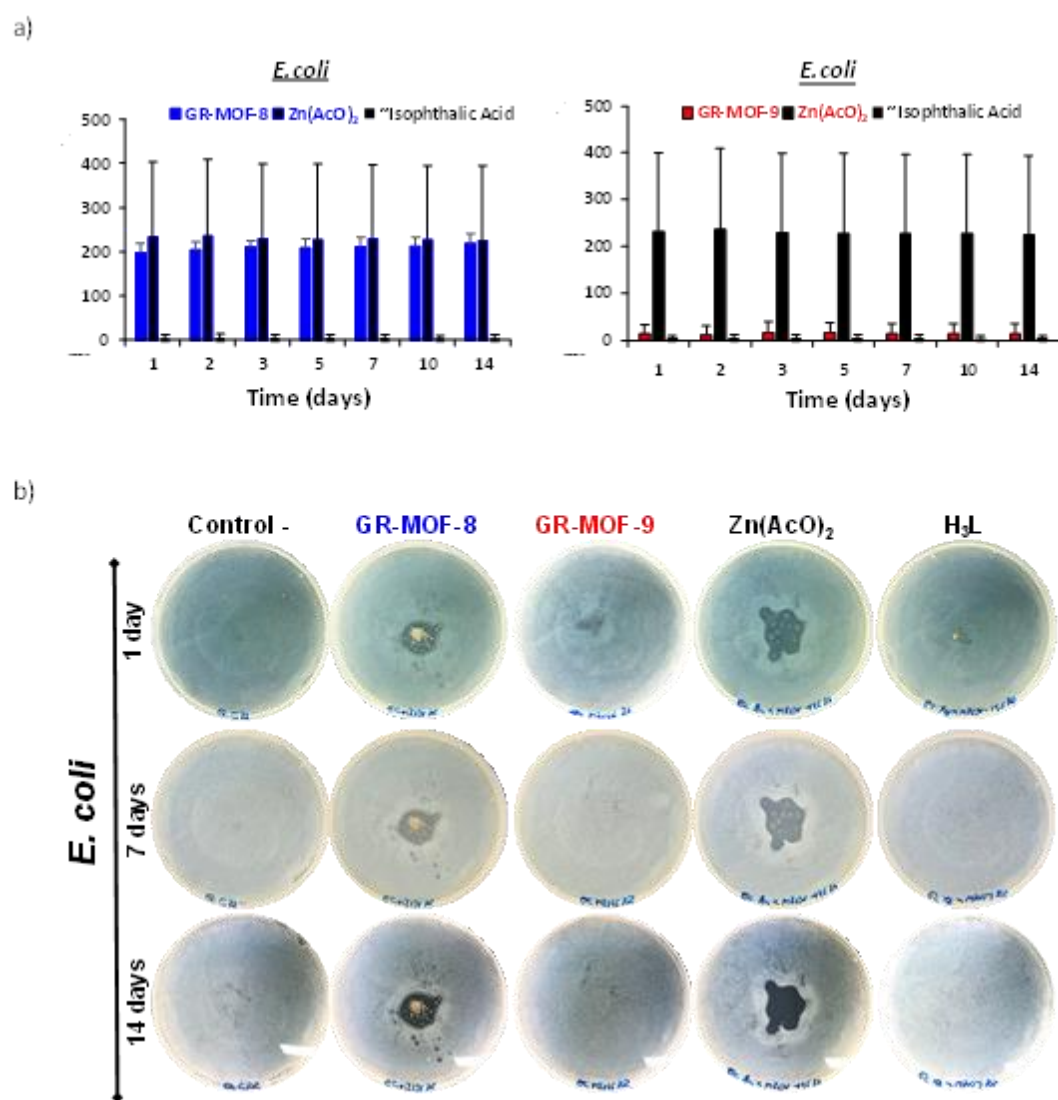

**Figure S6.** a) Halo inhibition zone experiments (mm<sup>2</sup>) of GR-MOF-8 (blue), GR-MOF-9 (red) and their precursors: Zn(AcO)<sub>2</sub>·H<sub>2</sub>O, H<sub>3</sub>L and negative control (C-) after 14 days in contact with *E. coli* cultures in agar plates at 37 °C; b) Representative images of inhibition experiments with culture of *E. coli* corresponding to GR-MOF-8 and GR-MOF-9, Zn(AcO)<sub>2</sub>·H<sub>2</sub>O, H<sub>3</sub>L and negative control in the same conditions.



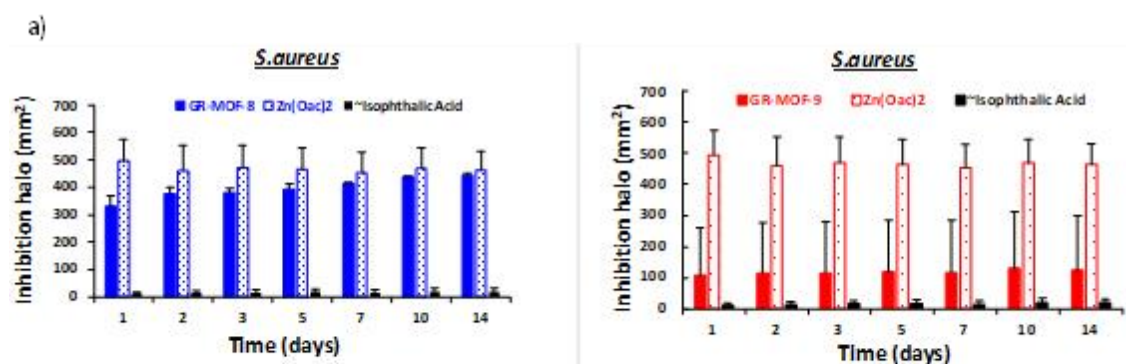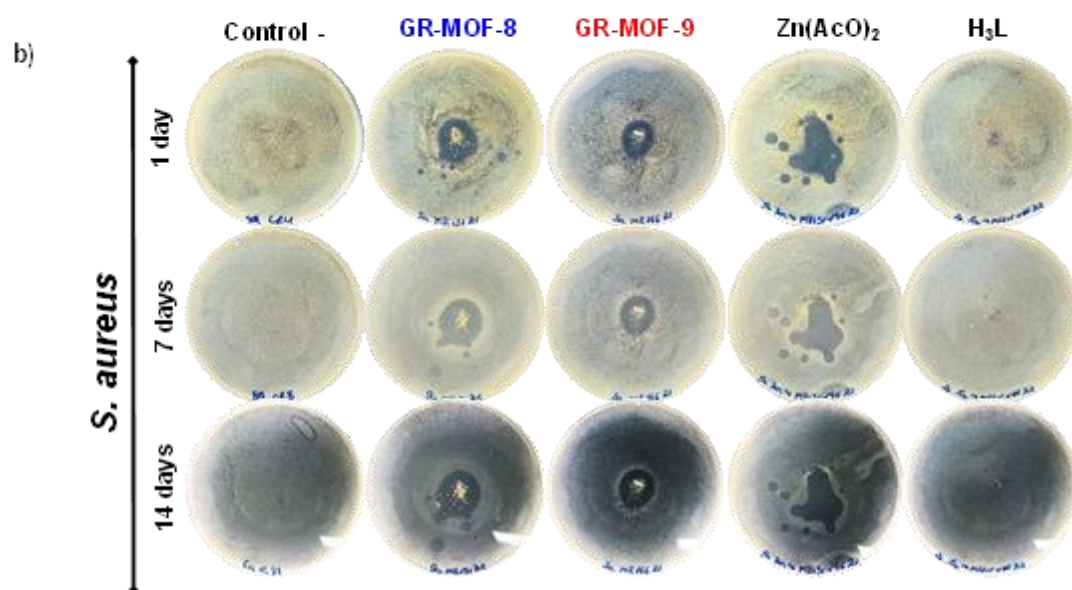

**Figure S7.** a) Halo inhibition zone experiments (mm<sup>2</sup>) of GR-MOF-8 (blue), GR-MOF-9 (red) and their precursors: Zn(AcO)<sub>2</sub>·H<sub>2</sub>O, H<sub>3</sub>L and negative control (C-) after 14 days in contact with *S. aureus* cultures in agar plates at 37 °C; b) Representative images of inhibition experiments with culture of *S. aureus* corresponding to GR-MOF-8 and GR-MOF-9, Zn(AcO)<sub>2</sub>·H<sub>2</sub>O, H<sub>3</sub>L, and negative control in the same conditions.

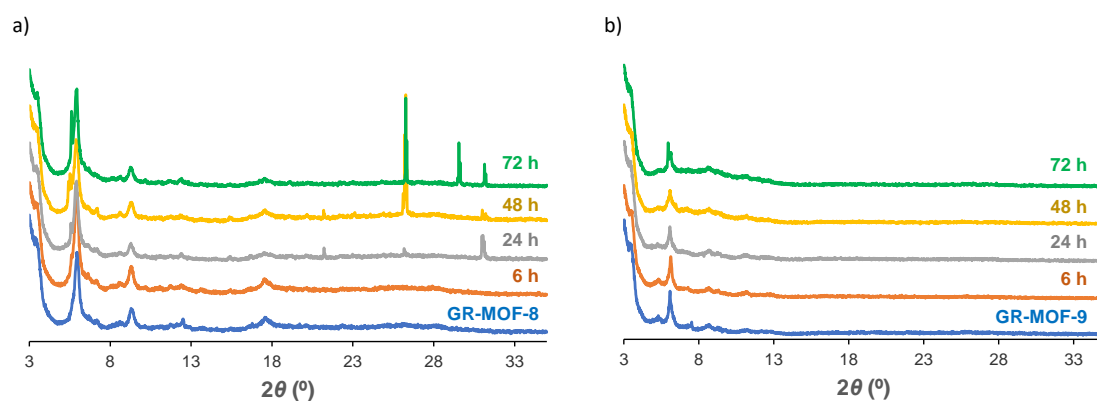

**Figure S8.** XRP diffraction stability studies of a) GR-MOF-8 and b) GR-MOF-9 in a high relative humidity (70%) ambient.
